# Supplementary material for: A faulty interaction between SOD1 and hCCS in neurodegenerative disease
Source: PubMed Central journal article supplement (PMC4901319; doi:10.1038/srep27691), 2016-06-10

## Supplementary Information:

### A faulty interaction between SOD1 and hCCS in neurodegenerative disease

Gareth S.A. Wright<sup>1,2</sup>, Svetlana V. Antonyuk<sup>1</sup> & S. Samar Hasnain<sup>1,2</sup>

<sup>1</sup> Molecular Biophysics Group, Institute of Integrative Biology, Faculty of Health and Life Sciences, University of Liverpool, UK.

<sup>2</sup> To whom correspondence should be addressed.

**Supplementary Figure S1.** DSF showing that SOD1 instability resulting from ALS mutations is largely ameliorated by complexation with hCCS. Unfolding transitions are I113T SOD1  $44.4 \pm 0.5$ , wtSOD1  $51.5 \pm 0.5$ , I113T SOD1- hCCS  $52.4 \pm 0.7$  and wtSOD1-hCCS  $53.3 \pm 0.5$  °C.

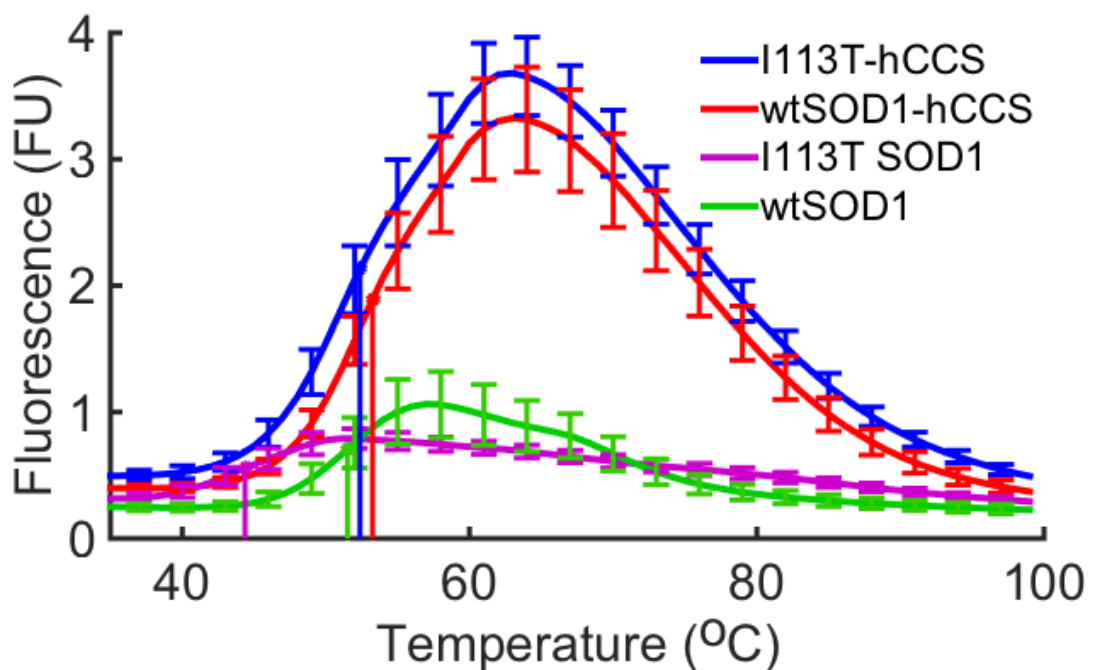

**Supplementary Figure S2.** Size exclusion chromatograms of zinc metalated and zinc free wild-type SOD1 showing apo-SOD1 eluting before zinc-SOD1 indicating increased  $R_h$ .

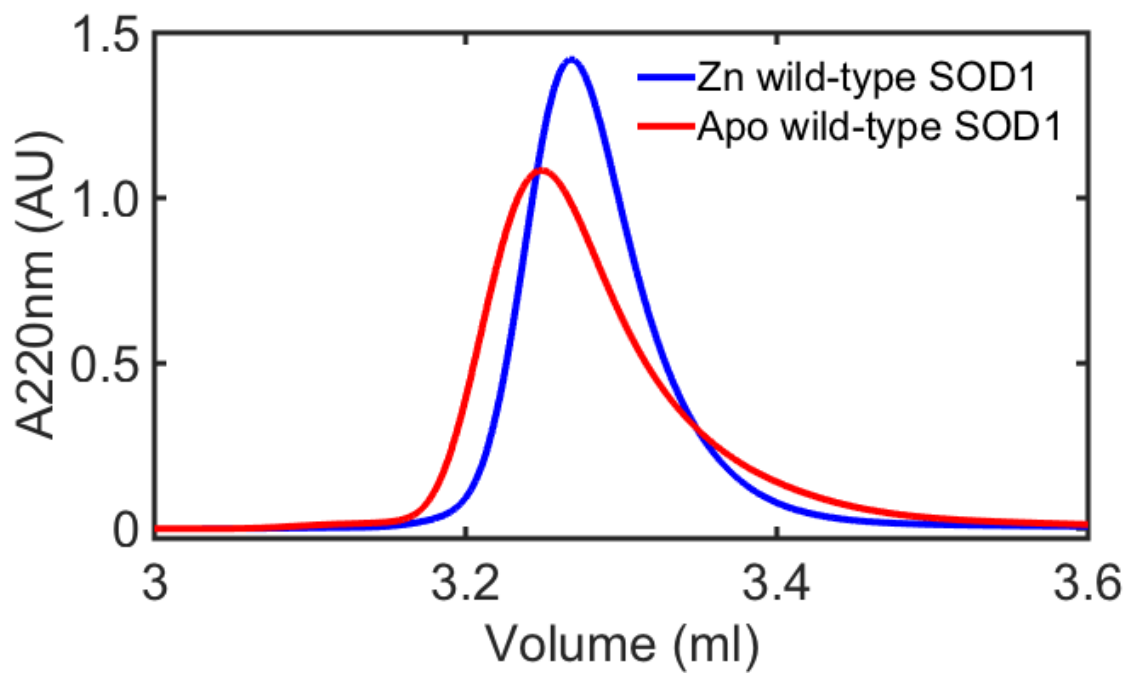

**Supplementary Figure S3.** SAXS curves for zinc metalated and zinc free wild-type SOD1. Zn-SOD1  $R_g$  20.9, apo-SOD1  $R_g$  21.9,  $D_{max}$  65 Å.

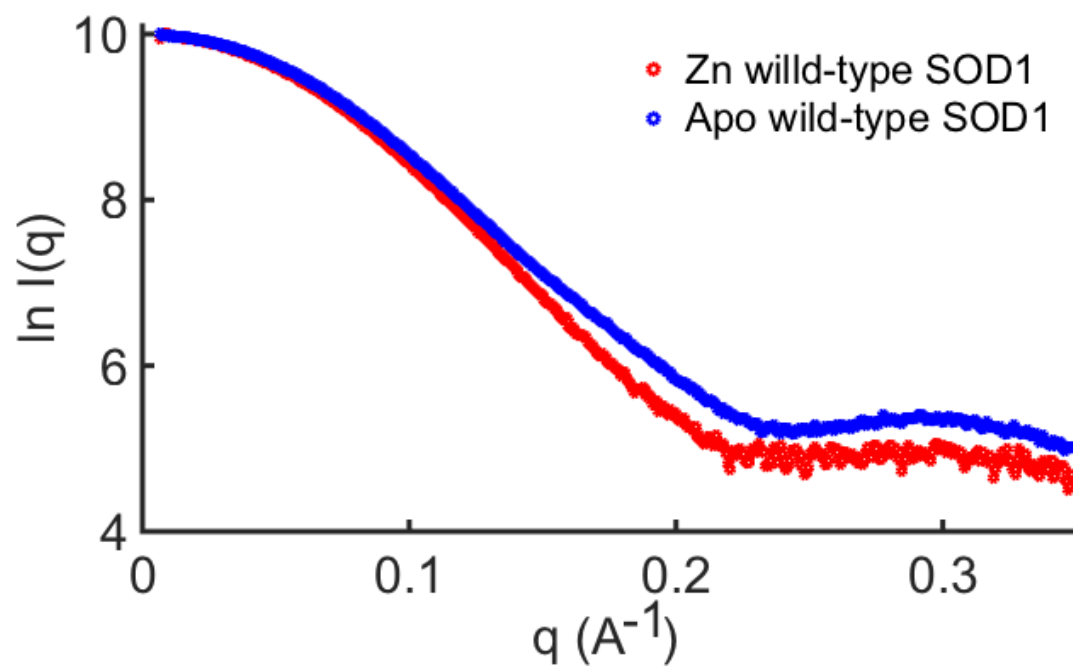

Supplement: srep27691-s1.pdf [file srep27691-s1.pdf]
